1 **Most Hospitalized Patients with Significant Tricuspid Regurgitation Have Advanced**  
2 **Disease Preventing Transcatheter Tricuspid Valve Intervention**

3  
4 **Short Title:** Most Significant TR Patients Not TTVI Candidates

5  
6 Allison O. Dumitriu Carcoana, B.A.<sup>a</sup>, Christopher B. Scoma, M.D.<sup>b</sup>, Sebastian N. Maletz, B.S.<sup>a</sup>,  
7 Jose A. Malavet, B.S.<sup>a</sup>, Daniela R. Crousillat, M.D.<sup>a,b</sup>, and Fadi A. Matar, M.D.<sup>a,b</sup>

8  
9 The University of South Florida Health Morsani College of Medicine, Tampa, FL, USA<sup>a</sup> and The  
10 Heart & Vascular Institute, Tampa General Hospital, Tampa, FL, USA<sup>b</sup>

11  
12 **Total word count:** 7,020

13  
14  
15  
16  
17 **Address for correspondence**

18 Fadi A. Matar, MD, FACC, FSCAI

19 Associate Professor of Medicine,  
20 Associate Director of Clinical Services  
21 University of South Florida Morsani College of Medicine  
22 Chief of Cardiology & Cath Lab Director  
23 Tampa General Hospital  
24 509 South Armenia Avenue  
25 Tampa, FL 33609

26  
27 Telephone: 813-917-4752

28 E-mail: [fmatar@usf.edu](mailto:fmatar@usf.edu)

29

30

31 **ABSTRACT**

32 **Background:** More than moderate tricuspid regurgitation (TR) is associated with high mortality.  
33 Surgical tricuspid valve repair and replacements are rarely performed due to high operative  
34 mortality risk, mainly attributed to late presentation. Novel transcatheter tricuspid valve  
35 intervention (TTVI) devices are being developed as an alternative to surgery. The population of  
36 patients presenting to tertiary care centers who can benefit from TTVI has not been well defined.  
37 Our objective was to study the characteristics of these patients and to define the sub-population  
38 who may be candidates for TTVI.

39 **Methods:** We analyzed 12,677 consecutive 2D echocardiograms completed at our tertiary care  
40 center between March 2021 and March 2022 and identified 581 inpatients with more than  
41 moderate TR. Clinical and echocardiographic data were collected by individual chart review.  
42 The 2021 European Society of Cardiology (ESC) guidelines on the management of valvular  
43 disease are currently the only guidelines that include TTVI. We used these guidelines to  
44 retrospectively assign the 581 patients to medical therapy, surgery, or TTVI treatment.

45 **Results:** 470 patients (80.9%) were assigned to medical therapy, 57 (9.8%) were assigned to  
46 TTVI, and 54 (9.3%) were assigned to tricuspid valve surgery. Of note, 76.2% (443/581) of  
47 patients were precluded from any intervention due to advanced disease or anatomic ineligibility,  
48 and only 4.6% (27/581) presented too early for intervention, being both asymptomatic and  
49 without RV dilatation.

50 **Conclusion:** Only 9.8 percent of patients presenting to a tertiary care center with significant TR  
51 would be hypothetical candidates for TTVI when these technologies are approved in the United  
52 States. Earlier identification and treatment of TR could increase the number of patients who may  
53 benefit from interventions including TTVI.

54 **CLINICAL PERSPECTIVE**

55 **What is New?**

- 56 • Most patients presenting to a tertiary care center with significant TR are too advanced for  
57 any intervention and have high in-hospital and late mortality rates.
- 58 • Tertiary care centers planning to offer TTVI should expect that, based on the current ESC  
59 guidelines and late presentation of TR, approximately 10% of patients with more than  
60 moderate TR will be TTVI candidates.

61

62 **What are the clinical implications?**

- 63 • There is a need to improve care for patients with TR through earlier detection and referral  
64 for intervention.
- 65 • Future clinical trials with longer follow up will be needed to assess TTVI devices in  
66 patients at earlier or even asymptomatic stages of TR when there may be a greater  
67 likelihood of improving survival.

## 68 INTRODUCTION

69 More than moderate tricuspid regurgitation (TR) is associated with high operative  
70 mortality.<sup>1-8</sup> Due to significant operative risk, surgical TVR is uncommonly performed due in  
71 part to late clinical presentation.<sup>9-12</sup> Several new transcatheter tricuspid valve intervention  
72 (TTVI) devices are being developed as a lower-risk alternative to surgery. Many of these devices  
73 are in use in Europe and are in the process of being evaluated for approval in the United States.<sup>13</sup>  
74 The prevalence of moderate and severe TR in the United States is estimated at 1,600,000.<sup>14</sup>  
75 However, the population of TR patients who can benefit from TTVI is yet to be defined.  
76 Furthermore, The European Society of Cardiology (ESC) 2021 guidelines for the management of  
77 valvular heart disease are the only guidelines that currently include TTVI as a treatment option.<sup>15</sup>  
78 As these therapies become available in the United States<sup>13</sup>, it is essential to understand the  
79 patient populations who may best benefit. In this study, we examined the clinical and  
80 echocardiographic variables of patients with significant TR presenting to a tertiary care center  
81 and defined the sub-population who may be candidates for TTVI, based on the ESC guidelines.

82

## 83 METHODS

84 We retrospectively identified 12,677 consecutive patients age  $\geq 18$  years who had a  
85 transthoracic echocardiogram performed at our center between March 2021 and March 2022. Of  
86 these, we collected the clinical and demographic information of 581 patients with more than  
87 moderate TR. A consistent group of cardiologists graded TR severity. To further justify our  
88 analysis, two cardiologists (C.B.S., D.R.C.) independently re-reviewed 10% of the  
89 echocardiograms. The difference of proportions was calculated to validate reliability of  
90 categorical parameters prone to some degree of subjectivity. The potentially subjective

91 parameters of importance to our study were the presence of more than moderate TR and the  
92 presence of severe right ventricular (RV) dysfunction. For TR severity, the difference of  
93 proportions was 0.05 with a standard error of 0.03 and a p-value of 0.0793. For RV dysfunction,  
94 the standard error was  $0.12 \pm 0.07$  with a p-value of 0.0791. Thus, we cannot conclude that there  
95 was a significant difference between the original and repeated echocardiogram reviews,  
96 substantiating consistent grading of these parameters.

97 We used the process described below to place patients into one of three retrospectively  
98 assigned treatment groups: medical therapy, surgery, or TTVI (Figure 1).<sup>15</sup> The retrospectively  
99 assigned treatments were not necessarily those applied in actual practice. Our Institutional  
100 Review Board (USF IRB Administrative Review; FWA No. 00001669) determined that this  
101 protocol met the criteria for exemption from IRB review. One author (F.A.M.) had full access to  
102 all the data in the study and takes responsibility for its integrity and the data analysis.

103

## 104 **Definitions**

### 105 *Modified ESC Algorithm*

106 The ESC guidelines recommend that a multidisciplinary Heart Team should determine patients'  
107 candidacy for surgery vs. TTVI. In clinical practice, all patients under consideration for TV  
108 surgery would be evaluated based on their clinical characteristics. However, the ESC guidelines  
109 do not specify the criteria that should be used for surgical candidacy. Our hypothetical Heart  
110 Team identified patients with age  $\geq 80$  or prior history of open-heart surgery, valve surgery,  
111 cirrhosis, or end-stage renal disease as too high risk for surgery. Patients considered for surgery  
112 based on ESC criteria who were too high risk based on Heart Team criteria were assigned to  
113 TTVI. Patients with primary TR who were too high-risk for surgery and not anatomically viable

114 candidates for TTVI based on endocarditis or congenital TR etiology were assigned to medical  
115 therapy. Our modifications to the ESC algorithm are depicted in Figure 2 and Figure 3.

116

### 117 *Need for Left-Sided Valve Surgery*

118 The first step was to determine whether patients needed left-sided valve surgery, criteria  
119 not well-defined in the ESC guidelines. We defined qualification for left-sided valve surgery as  
120 >moderate mitral or aortic valve regurgitation or stenosis plus meeting Heart Team criteria. The  
121 patients who did not qualify were then divided by primary and secondary TR etiologies.

122

### 123 *Primary TR Without Left Sided Valve Dysfunction*

124 Primary TR included endocarditis, carcinoid, lead impingement, and congenital causes.  
125 The ESC guidelines recommend first determining whether these patients had symptoms of right  
126 heart failure (RHF). NYHA class was not available for over half of our cohort, therefore; we  
127 defined signs of RHF as lower extremity edema or ascites around the time of the  
128 echocardiogram. Asymptomatic patients were then assessed for RV dilatation. RV dilatation was  
129 determined in accordance with the 2015 American Society of Echocardiography (ASE)  
130 recommendations for cardiac chamber quantification, including basal diameter >41mm, mid  
131 diameter >35mm, or longitudinal diameter >83mm.<sup>16</sup> Asymptomatic patients without RV  
132 dilatation were assigned to medical therapy. Patients with symptoms or RV dilatation were  
133 evaluated for surgical candidacy. Those who qualified were assigned to tricuspid valve surgery,  
134 while those at too high a surgical risk were assigned to TTVI.

135

### 136 *Secondary TR Without Left Sided Valve Dysfunction*

137           The ESC guidelines recommend that for the patients who do not qualify for left-sided  
138 surgery and have secondary TR: severe RV dysfunction, severe LV dysfunction, and severe  
139 pulmonary hypertension are exclusion criteria from any intervention, surgical or transcatheter.  
140 We assessed the degree of dysfunction based on the echocardiograms using criteria from the  
141 2015 ASE recommendations.<sup>16</sup> Severe RV dysfunction was qualitatively described and  
142 confirmed quantitatively with a TAPSE <17 mm or an S' <10 cm/s. Severe LV dysfunction was  
143 defined as LVEF <30%. Severe pulmonary hypertension was defined as right ventricular systolic  
144 pressure >55 mmHg or TR jet velocity >3.6m/s with systolic septal flattening. The patients who  
145 met at least one criterion had advanced disease preventing the use of any intervention and were  
146 assigned to the medical therapy group.

147           Of the remaining patients, those who were asymptomatic with no RV dilatation were  
148 assigned to medical therapy. Those who were symptomatic or asymptomatic with RV dilatation  
149 were assigned to either surgery or TTVI based on Heart Team criteria.

150

#### 151 *Early vs. Late Presentation*

152           We divided the medical therapy group by early and late presenters, so that TR etiology  
153 and mortality data could be more accurately assessed with respect to disease severity. Patients  
154 without need for left-sided valve surgery who have secondary TR without severe LV  
155 dysfunction, severe RV dysfunction, severe pulmonary hypertension, symptoms of RHF, and RV  
156 dilatation were assigned to medical therapy. Similarly, patients with primary TR without  
157 symptoms of RHF and without RV dilatation were assigned to medical therapy. These two  
158 groups were therefore assigned to medical therapy due to early presentation.

159 On the other hand, patients with severe LV or RV dysfunction or severe pulmonary  
160 hypertension were precluded from any intervention and were therefore assigned to medical  
161 therapy due to advanced stage disease. In our modified ESC algorithm, we also considered the  
162 primary TR patients assigned to medical therapy due to high surgical risk and anatomical  
163 unviability for TTVI as advanced.

164

### 165 **TR Etiology**

166 We determined the subtype of functional TR based on the process described by Topilsky  
167 et al.<sup>17</sup> Left-sided valvular disease was defined as greater than moderate mitral or aortic valve  
168 regurgitation or stenosis. LV systolic dysfunction was defined as LVEF <40% and the absence of  
169 moderate-severe left valvular disease. Severe pulmonary hypertension was defined as pulmonary  
170 arterial pressure >55 mmHg or TR jet velocity >3.6m/s with systolic septal flattening and the  
171 absence of both moderate-severe left sided valvular disease and LV systolic dysfunction. Isolated  
172 TR was defined by the absence of severe pulmonary hypertension, moderate-severe left valvular  
173 disease, and LV systolic dysfunction.

174

### 175 **Statistics**

176 The standard error of proportions was calculated between the original and repeated  
177 assessments of TR severity and RV dysfunction for 10% of the echocardiograms included in this  
178 study. This was done to validate the reliability of these parameters because they may be prone to  
179 some degree of subjectivity. We reported mean  $\pm$  standard deviation or median and first and third  
180 quartile (Q1, Q3) values for continuous variables and frequency (percentage) for categorical  
181 variables. Variables that did not follow a normal distribution curve were reported as median (Q1,



182 Q3). Cox regression analysis was used for survival analysis, presented as the median survival  
183 time with standard deviation and 95% confidence intervals. Kaplan-Meier curves were generated  
184 to compare overall survival between the whole cohort compared to survival curves of each  
185 treatment group, with medical therapy divided into early and advanced groups. IBM SPSS  
186 Statistics for Macintosh, Version 29.0, was used for survival analysis.

187

## 188 **RESULTS**

### 189 **Patient Characteristics**

190 Table 1 displays a summary of all clinical data collected for the 581 patients with more  
191 than moderate TR. In this cohort, 52.3% (304/581) were women, 56.3% (325/577) were White,  
192 and the average age was 65.7 years. Of note, lower extremity edema was present in 67.8%  
193 (394/581), ascites in 34.3% (199/581), cirrhosis in 17.7% (103/581), and atrial fibrillation or  
194 flutter in 60.9% (354/581). Of the patients who had NYHA class noted in their chart, 78.5%  
195 (234/298) were NYHA class III or IV. Table 2 displays the echocardiographic parameters of the  
196 581 patients. 92.8% (539/581) had functional TR. The median TAPSE was 15 mm, median  
197 RVSP 58 mmHg, and 57.0% (306/537) had severe pulmonary hypertension.

198

### 199 **Treatment Groups Assigned Using the ESC 2021 Guidelines**

200 Figure 3 displays the numbers of patients who were assigned to each treatment group of  
201 the modified ESC algorithm.

202

203 *Need for Left-Sided Valve Surgery*

204           64 patients had >moderate mitral regurgitation, mitral stenosis, aortic regurgitation, or  
205 aortic stenosis. Of these, 25 qualified for surgery and 39 were too high risk.

206

#### 207 *Primary TR Without Left Sided Valve Dysfunction*

208           40 of the 556 patients who did not qualify for left-sided valve surgery had primary TR.  
209 Of these, 23 had symptoms of RHF, and 17 did not. Of the 23 symptomatic patients, 12 were too  
210 high risk for surgery. Of these 12, seven had endocarditis (n = 6) or congenital (n = 1) TR  
211 etiologies, characterizing anatomic ineligibility for percutaneous treatment via TTVI, and were  
212 therefore assigned to medical therapy. The remaining five were appropriate for TTVI with  
213 carcinoid (n = 4) or lead impingement (n = 1) TR etiologies.

214           The 17 asymptomatic patients were assessed for RV dilatation. Eight had RV dilatation,  
215 and of these, three were appropriate for surgery. The other five had endocarditis, so they were  
216 assigned to medical therapy. The nine remaining patients who were both asymptomatic and  
217 without RV dilatation were assigned to medical therapy based on the ESC guidelines.

218

#### 219 *Secondary TR Without Left Sided Valve Dysfunction*

220           The remaining 516 patients who did not qualify for left-sided valve surgery had  
221 secondary (functional) TR. Of these, 431 had severe LV or RV dysfunction or severe pulmonary  
222 hypertension and were assigned to medical therapy. Of the 85 patients without severe  
223 dysfunction, 55 patients were symptomatic; 12 were appropriate for surgery, and 43 were  
224 assigned to TTVI instead. Regarding the 30 asymptomatic patients, 18 had no RV dilatation and

225 were assigned to medical therapy. The remaining 12 underwent assessment by Heart Team  
226 criteria, and three were ultimately appropriate for surgery, while nine were assigned to TTVI.

227

### 228 *Assigned Treatment Groups*

229 In total, 470 patients (80.9%) were assigned to medical therapy, 57 (9.8%) were assigned  
230 to TTVI, and 54 (9.3%) were assigned to tricuspid valve surgery. TV surgery can be further  
231 divided into concomitant (n = 25/54, 46.3.0%) and isolated tricuspid valve surgeries (n = 29/54,  
232 53.7%). Of note, 76.2% (443/581) of patients were precluded from any intervention due to  
233 advanced ventricular dysfunction, severe pulmonary hypertension, or anatomic ineligibility, and  
234 only 4.6% (27/581) presented too early for intervention, being both asymptomatic and without  
235 RV dilatation.

236 Table S1 describes the clinical characteristics of each assigned treatment group, and  
237 Table S2 presents their echocardiographic parameters. Table 3 displays the TR etiologies in each  
238 treatment group. In Table 3, we divide the medical therapy group by early and late presentation.

239

### 240 **Concomitant CABG**

241 In clinical practice, TV surgery is also performed with concomitant Coronary Artery  
242 Bypass Graft surgery (CABG), but it is not included in the 2021 ESC guidelines. In our cohort,  
243 2.9% (17/581) of patients were possible candidates for CABG based on coronary angiography  
244 performed within six months of the index echocardiogram. Of these 17 patients, only three  
245 remained surgical candidates after applying the Heart Team criteria. Two of these three were  
246 already assigned to TV surgery, and the remaining patient had been assigned to medical therapy

247 due to advanced stage. Thus, the addition of concomitant CABG as a consideration for assigning  
248 treatment groups in our cohort would result in approximately equal cohort numbers. One patient  
249 in our cohort (whom we assigned to surgery) underwent surgical TVR with concomitant CABG  
250 during the follow-up period.

251

## 252 **Survival**

253 Each patient in the study had a follow-up time of at least six months or until death. In-  
254 hospital and 18-month mortality were highest amongst the patients assigned to TTVI (19.3%,  
255 28.1%) and medical therapy with late presentation (18.5%, 28.9%; Table 4).

256 In Figure 4, we present the survival curves for the whole cohort compared to survival  
257 curves of each treatment group, with medical therapy divided into early and advanced groups.  
258 The mean overall survival time in the total cohort was 14.5 months  $\pm$  a standard error of 0.4  
259 months (95% confidence interval [CI] = 13.74 – 15.31 months). Survival time was shortest in  
260 those assigned to TTVI (13.3  $\pm$  1.2 months, 95% CI = 11.0 – 15.6) and medical therapy with  
261 advanced stage (14.0  $\pm$  0.5 months, 95% CI = 13.1 – 14.9). Those assigned to medical therapy  
262 with early presentation had the longest overall survival (18.1  $\pm$  1.0 months, 95% CI = 16.1 –  
263 20.0), followed by those assigned to surgery (15.1  $\pm$  1.0 months, 95% CI = 13.2 – 17.0).

264

## 265 **TR Management in Actual Practice**

266 Of the 470 patients retrospectively assigned to medical therapy by the ESC guidelines,  
267 97.7% (459/470) received medical therapy, nine underwent TV surgery, and two underwent  
268 TTVI. Our center currently performs heterotopic caval valve implantation (TricValve®) on a  
269 compassionate-use basis. Of the 54 patients assigned to TV surgery, 79.6% (43/54) received

270 medical therapy, and 20.4% (11/54) underwent TV surgery, one of which was concomitant TVR  
271 with CABG. One of the patients assigned to TTVI underwent TricValve® implantation, two  
272 underwent TV surgery, and the remaining 54 received medical therapy. In total, 556 of the  
273 patients received medical therapy, 22 underwent TV surgery, and three received TTVI during the  
274 study's follow-up period.

275

## 276 **DISCUSSION**

277 In this retrospective study of consecutive patients with more than moderate TR presenting to  
278 a tertiary care center, we showed that a minority (9.8%) could qualify for TTVI, and 76.2% had  
279 advanced left or right ventricular dysfunction or severe pulmonary hypertension precluding any  
280 surgical or transcatheter intervention. The in-hospital and 18-month mortality rates were grimly  
281 high in the advanced stage medical therapy and TTVI cohorts at 18.5%, 28.9% and 19.3%,  
282 28.1%, respectively. Although we are unable to comment on which specific TTVI device  
283 patients are candidates for, our study sheds light on the clinical and echocardiographic  
284 characteristics of this patient population and their outcomes at a tertiary care center.

285 There are currently four categories of TTVI, which are at various developmental stages:  
286 coaptation devices (TriClip®, Pascal®, Dragonfly®, FORMA®), annuloplasty devices  
287 (cardioband®, K-Clip®, Trialign®, TriCinch®) orthotopic replacement (Evoque®, Lux®, Intrepid®)  
288 and heterotopic replacement (TricValve®, Trillium®). The first three devices aim to reduce TR  
289 severity, and the last one reduces venous congestion caused by it. There are no commercially  
290 available TR-reducing transcatheter devices in the United States, and the TricValve® is only  
291 available for compassionate use. Some coaptation (TriClip® and Pascal®) and annuloplasty  
292 devices (cardioband®) are commercially available in Europe, and the TriClip is expected to get

293 approval from the Food and Drug Administration in the United States following the Trial to  
294 Evaluate Treatment with Abbott Transcatheter Clip Repair System in Patients with Moderate or  
295 Greater Tricuspid Regurgitation (TRILUMINATE) meeting its primary endpoint.<sup>18-19</sup>

296 Although several non-randomized controlled trials (RCT's)<sup>20-27</sup> using various types of TTVI  
297 devices showed symptomatic relief, the ideal timing of intervention to impact survival remains to  
298 be defined.<sup>28-29</sup> The TRILUMINATE study on tricuspid edge-to-edge repair is the only RCT  
299 testing a TTVI device.<sup>19</sup> It showed that TriClip met its primary composite endpoint of all-cause  
300 mortality, tricuspid valve surgery, heart failure hospitalizations, and quality-of-life improvement  
301 using the Kansas City Cardiomyopathy Questionnaire (KCCQ) score at 12 months, but that was  
302 mainly driven by improvements in the KCCQ score. It is unclear at this stage if mortality would  
303 be reduced by Triclip after the two-year follow-up planned for this trial is completed.

304 While heterotopic TV replacement is a catheter-based device, it is generally a non-corrective  
305 procedure, and for the purposes of our study, we did not consider it TTVI. Except for the three  
306 patients who underwent TricValve implantation, none underwent TTVI because we did not have  
307 access to these therapies during the study period. Therefore, the 28.1% mortality rate of the  
308 patients allocated to the TTVI group reflects the untreated mortality rate of this cohort. This rate  
309 is almost threefold higher than the 10.6% mortality rate seen in the control arm of the  
310 TRILUMINATE trial, which is not surprising given the higher prevalence of comorbidities and  
311 advanced-stage disease in our TTVI group (liver cirrhosis 36.6%, CKD 65.9%, ESRD 19.3%)  
312 compared to the control group enrolled in TRILUMINATE (liver disease 9.1%, CKD 35.4%,  
313 ESRD 0%).<sup>19</sup>

314 The characteristics of the patients who are candidates for TTVI in our study mirror those of  
315 the TriValve registry patients.<sup>30</sup> This registry is an ongoing, prospective database of all patients

316 undergoing TTVI outside of RCT's. In 2017, they reported on 107 patients with clinically  
317 significant TR treated with various TTVI devices, mainly the MitraClip device. The mean age  
318 was 76 years, atrial fibrillation 79%, female 60%, ascites 27%, NYHA class III or IV 95%, prior  
319 left-sided valve surgery 26%, mean LVEF 51%, and mean TAPSE 16 mm. These demographics  
320 and clinical variables were very similar to our TTVI patient cohort; mean age of 75 years, atrial  
321 arrhythmia 79%, female 56%, ascites 35%, NYHA class III or IV 82%, prior valve surgery 26%,  
322 mean LVEF 54%, and mean TAPSE 20 mm.

323 The TTVI treatment group in our study was derived from a pool of patients who presented to  
324 our tertiary care center with an already high burden of comorbidities and end-organ disease (liver  
325 cirrhosis 17.7%, CKD 64.0%, ESRD 19.8%) and a 26.7% mortality rate. There is a direct  
326 association between TR severity and mortality<sup>8, 31-33</sup>, but comorbidities, which are indicators of  
327 late presentation and end-organ failure, predict mortality independent of TR severity.<sup>17</sup>  
328 Breitninger et al. showed that age, male gender, renal dysfunction, presence of CHF, liver  
329 disease, lung disease, and TR severity were independently associated with mortality.<sup>22</sup> Topilsky  
330 et al. showed that left sided valvular disease and LV systolic dysfunction were associated with  
331 the poorest survival in patients with functional TR, followed by pulmonary hypertension and  
332 primary TR.<sup>17</sup>

333 As discussed above, our study's patient population had a high burden of comorbidities and  
334 signs of end-stage disease than the TRILUMINATE population. Therefore, TTVI performed at  
335 the advanced stage noted in our inpatient cohort may not impact survival although it could  
336 improve quality of life. A suggestion that this might be the case comes from the Mayo Clinic  
337 study by Breitinger et al. done in 13,608 with moderate to severe TR and a median follow-up of  
338 6.5 years.<sup>33</sup> In patients with significant comorbidities, the severity of TR was not associated with

339 differences in survival. In contrast, in those with fewer comorbidities, increasing TR severity was  
340 associated with worse survival. Another study showed similar results. Neuhold et al. studied 576  
341 patients with heart failure and noted that TR severity was predictive of poor outcomes in those  
342 with mildly to moderately impaired LV function but not in those with a severely depressed EF.<sup>34</sup>  
343 Nonetheless, it is reassuring that the TriValve registry reported a low all-cause 30-day mortality  
344 rate of 3.7% in 106 patients who underwent TTVI, despite a high prevalence of comorbidities.<sup>30</sup>  
345 It is unclear, however, if there are unreported factors that led to a selection bias in the TriValve  
346 registry, resulting in a more favorable 30-day mortality rate.

347 Tricuspid regurgitation is a complex disease with etiology having an impact on management  
348 and outcomes. Most TR is functional, thus the rate of progression and success of treatment  
349 depends on non-tricuspid valve drivers, such as aortic and mitral valvular disease, ventricular  
350 function, and arrhythmia control.<sup>35</sup> Clinical trials of TTVI devices aiming to reduce TR will  
351 need to account for these diseases. Adding to the complexity is the fragile nature of the right  
352 ventricle that is not designed to withstand chronic pressure and volume overload. Seventy six  
353 percent of the patients in our study had disease too advanced for any intervention with a  
354 mortality rate just under 30% by 18 months. This rate stresses the importance of early detection  
355 that should initiate a comprehensive management plan for all factors contributing to TR, and  
356 early referral for intervention.<sup>36</sup>

357 Therefore, future clinical trials using TTVI devices should not only focus on patients with  
358 advanced stages but also on those at earlier or even asymptomatic stages of TR where early  
359 intervention may confer a survival benefit in addition to symptomatic benefit.<sup>37</sup> The Mayo Clinic  
360 reported that patients with a low TRIO (Tricuspid Regurgitation Impact on Outcomes) score with



361 few comorbidities might benefit the most from interventions to correct TR, based on 10-year all-  
362 cause mortality.<sup>33</sup> Provided that evidence of improved survival may be realized with longer  
363 follow-up, we expect that TTVI guidelines would eventually evolve to include lower-risk  
364 patients, analogous to the evolution of the guidelines for the transcatheter aortic valve  
365 implantation (TAVI) procedure.

366       Limitations of this retrospective, single-center analysis merit consideration. NYHA  
367 functional class was not defined for over half of our cohort, and thus physical exam history of  
368 lower extremity edema or ascites was used to indicate signs of RHF instead. Due to differences  
369 in patients' transthoracic echocardiogram imaging, some echocardiographic parameters, such as  
370 the S' or TAPSE were not measurable for all patients. Furthermore, the ESC 2021 guidelines do  
371 not specifically define parameters for determining appropriateness for surgery, so we used our  
372 own criteria, which may have underestimated the number of patients who were too high risk for  
373 surgery.

374       The present study findings show that most patients presenting to a tertiary care center  
375 with more than moderate TR are too advanced for any intervention and have high in-hospital and  
376 late mortality rates. We illustrated that a minority of these patients would clinically qualify for  
377 TTVI. There is a need to improve care for patients with TR through earlier detection that should  
378 initiate a comprehensive management plan for all factors contributing to TR, and early referral  
379 for intervention. Future clinical trials with longer follow up will be needed to assess TTVI  
380 devices in patients at earlier or even asymptomatic stages of TR when there may be a greater  
381 likelihood of improving survival.

382

383 **ACKNOWLEDGEMENTS**

384 The authors acknowledge the invaluable assistance of the structural cardiology team at the  
385 Tampa General Hospital Heart and Vascular Institute in the conduct of this study.

386 Conceptualization and methodology: A.O.D.C., C.B.S, D.R.C., and F.A.M. Investigation:  
387 A.O.D.C., C.B.S, S.N.M., and J.A.M. Formal analysis and interpretation: A.O.D.C., C.B.S,  
388 D.R.C., and F.A.M. Writing: A.O.D.C., C.B.S, and F.A.M. Writing–review and editing and  
389 supervision: A.O.D.C., C.B.S, S.N.M., J.A.M., D.R.C., and F.A.M.

390

391 **SOURCES OF FUNDING**

392 This study did not include any sources of funding.

393

394 **DISCLOSURES**

395 None.

396

397 **REFERENCES**

- 398 1. Nath J, Foster E, Heidenreich PA. Impact of tricuspid regurgitation on long-term survival. *J*  
399 *Am Coll Cardiol*. 2004 Feb 4;43(3):405-9. doi: 10.1016/j.jacc.2003.09.036.  
400
- 401 2. Agricola E, Stella S, Gullace M, Ingallina G, D'Amato R, Slavich M, Oppizzi M, Ancona MB,  
402 Margonato A. Impact of functional tricuspid regurgitation on heart failure and death in patients  
403 with functional mitral regurgitation and left ventricular dysfunction. *Eur J Heart Fail*. 2012  
404 Aug;14(8):902-8. doi: 10.1093/eurjhf/hfs063.  
405
- 406 3. Dahou A, Magne J, Clavel MA, Capoulade R, Bartko PE, Bergler-Klein J, Sénéchal M,  
407 Mundigler G, Burwash I, Ribeiro HB, et al. Tricuspid Regurgitation Is Associated With  
408 Increased Risk of Mortality in Patients With Low-Flow Low-Gradient Aortic Stenosis and  
409 Reduced Ejection Fraction: Results of the Multicenter TOPAS Study (True or Pseudo-Severe  
410 Aortic Stenosis). *JACC Cardiovasc Interv*. 2015 Apr 20;8(4):588-96. doi:  
411 10.1016/j.jcin.2014.08.019.  
412
- 413 4. Fujisawa T, Kimura T, Ikemura N, Miyama H, Katsumata Y, Ueda I, Tanimoto K, Kanki H,  
414 Fukuda K, Kohsaka S, et al. Effect of Tricuspid Regurgitation on the Reported Quality of Life  
415 and Subsequent Outcomes in Patients With Atrial Fibrillation. *J Am Heart Assoc*. 2022 Apr  
416 19;11(8):e022713. doi: 10.1161/JAHA.121.022713.  
417
- 418 5. Hu K, Liu D, Störk S, Herrmann S, Oder D, Ertl G, Voelker W, Weidemann F, Nordbeck P.  
419 Echocardiographic Determinants of One-Year All-Cause Mortality in Patients With Chronic

420 Heart Failure Complicated by Significant Functional Tricuspid Regurgitation. *J Card Fail.* 2017  
421 Jun;23(6):434-443. doi: 10.1016/j.cardfail.2016.11.005.  
422

423 6. Mutlak D, Lessick J, Khalil S, Yalonetsky S, Agmon Y, Aronson D. Tricuspid regurgitation in  
424 acute heart failure: is there any incremental risk? *Eur Heart J Cardiovasc Imaging.* 2018 Sep  
425 1;19(9):993-1001. doi: 10.1093/ehjci/jex343. PMID: 29346535.  
426

427 7. Santas E, Chorro FJ, Miñana G, Méndez J, Muñoz J, Escribano D, García-Blas S, Valero E,  
428 Bodí V, Núñez E, et al. Tricuspid Regurgitation and Mortality Risk Across Left Ventricular  
429 Systolic Function in Acute Heart Failure. *Circ J.* 2015;79(7):1526-33. doi: 10.1253/circj.CJ-15-  
430 0129.  
431

432 8. Wang N, Fulcher J, Abeysuriya N, McGrady M, Wilcox I, Celermajer D, Lal S. Tricuspid  
433 regurgitation is associated with increased mortality independent of pulmonary pressures and  
434 right heart failure: a systematic review and meta-analysis. *Eur Heart J.* 2019 Feb 1;40(5):476-  
435 484. doi: 10.1093/eurheartj/ehy641.  
436

437 9. Zack CJ, Fender EA, Chandrashekar P, Reddy YNV, Bennett CE, Stulak JM, Miller VM,  
438 Nishimura RA. National Trends and Outcomes in Isolated Tricuspid Valve Surgery. *J Am Coll*  
439 *Cardiol.* 2017 Dec 19;70(24):2953-2960. doi: 10.1016/j.jacc.2017.10.039.  
440

- 441 10. Weiss T, Villadsen PR, Jensen JK, Lehnert P, Nielsen PH, Modrau IS. Outcomes of isolated  
442 tricuspid valve surgery in contemporary practice. *Eur J Cardiothorac Surg*. 2022 Jul  
443 11;62(2):ezac077. doi: 10.1093/ejcts/ezac077.
- 444
- 445 11. Axtell AL, Bhambhani V, Moonsamy P, Healy EW, Picard MH, Sundt TM 3rd, Wasfy JH.  
446 Surgery Does Not Improve Survival in Patients With Isolated Severe Tricuspid Regurgitation. *J*  
447 *Am Coll Cardiol*. 2019 Aug 13;74(6):715-725. doi: 10.1016/j.jacc.2019.04.028.
- 448
- 449 12. Brescia AA, Ward ST, Watt TMF, Rosenbloom LM, Baker M, Khan S, Ziese E, Romano  
450 MA, Bolling SF; Michigan Mitral Research Group (MMRG). Outcomes of Guideline-Directed  
451 Concomitant Annuloplasty for Functional Tricuspid Regurgitation. *Ann Thorac Surg*. 2020  
452 Apr;109(4):1227-1232. doi: 10.1016/j.athoracsur.2019.07.035.
- 453
- 454 13. Blusztajn DI, Hahn RT. New therapeutic approach for tricuspid regurgitation: Transcatheter  
455 tricuspid valve replacement or repair. *Front Cardiovasc Med*. 2023 Feb 23;10:1080101. doi:  
456 10.3389/fcvm.2023.1080101.
- 457
- 458 14. Stuge O, Liddicoat J. Emerging opportunities for cardiac surgeons within structural heart  
459 disease. *J Thorac Cardiovasc Surg*. 2006 Dec;132(6):1258-61. doi: 10.1016/j.jtcvs.2006.08.049.
- 460
- 461 15. Vahanian A, Beyersdorf F, Praz F, Milojevic M, Baldus S, Bauersachs J, Capodanno D,  
462 Conradi L, De Bonis M, De Paulis R, et al. 2021 ESC/EACTS Guidelines for the management of  
463 valvular heart disease. *Eur Heart J*. 2022 Feb 12;43(7):561-632. doi: 10.1093/eurheartj/ehab395.

464

465 16. Lang RM, Badano LP, Mor-Avi V, Afilalo J, Armstrong A, Ernande L, Flachskampf FA,  
466 Foster E, Goldstein SA, Kuznetsova T, et al. Recommendations for cardiac chamber  
467 quantification by echocardiography in adults: an update from the American Society of  
468 Echocardiography and the European Association of Cardiovascular Imaging. *J Am Soc*  
469 *Echocardiogr*. 2015 Jan;28(1):1-39.e14. doi: 10.1016/j.echo.2014.10.003.

470

471 17. Topilsky Y, Maltais S, Medina Inojosa J, Oguz D, Michelena H, Maalouf J, Mahoney DW,  
472 Enriquez-Sarano M. Burden of Tricuspid Regurgitation in Patients Diagnosed in the Community  
473 Setting. *JACC Cardiovasc Imaging*. 2019 Mar;12(3):433-442. doi: 10.1016/j.jcmg.2018.06.014.

474

475 18. Hahn RT, Nabauer M, Zuber M, Nazif TM, Hausleiter J, Taramasso M, Pozzoli A, George I,  
476 Kodali S, Bapat V, et al. Intraprocedural Imaging of Transcatheter Tricuspid Valve  
477 Interventions. *JACC Cardiovasc Imaging*. 2019 Mar;12(3):532-553. doi:  
478 10.1016/j.jcmg.2018.07.034.

479

480 19. Sorajja P, Whisenant B, Hamid N, Naik H, Makkar R, Tadros P, Price MJ, Singh G, Fam N,  
481 Kar S, et al. Transcatheter Repair for Patients with Tricuspid Regurgitation. *N Engl J Med*. 2023  
482 May 18;388(20):1833-1842. doi: 10.1056/NEJMoa2300525.

483

484 20. Sorajja P, Cavalcante JL, Gossel M, Bae R. Transcatheter repair of tricuspid regurgitation  
485 with MitraClip. *Prog Cardiovasc Dis*. 2019 Nov-Dec;62(6):488-492. doi:  
486 10.1016/j.pcad.2019.10.001.

487

488 21. Fam NP, Braun D, von Bardeleben RS, Nabauer M, Ruf T, Connelly KA, Ho E, Thiele H,  
489 Lurz P, Weber M, et al. Compassionate Use of the PASCAL Transcatheter Valve Repair System  
490 for Severe Tricuspid Regurgitation: A Multicenter, Observational, First-in-Human Experience.  
491 *JACC Cardiovasc Interv.* 2019 Dec 23;12(24):2488-2495. doi: 10.1016/j.jcin.2019.09.046.

492

493 22. Lurz P, Besler C, Noack T, Forner AF, Bevilacqua C, Seeburger J, Rommel KP, Blazek S,  
494 Hartung P, Zimmer M, et al. Transcatheter treatment of tricuspid regurgitation using edge-to-  
495 edge repair: procedural results, clinical implications and predictors of success. *EuroIntervention.*  
496 2018 Jun 8;14(3):e290-e297. doi: 10.4244/EIJ-D-17-01091.

497

498 23. Mehr M, Taramasso M, Besler C, Ruf T, Connelly KA, Weber M, Yzeiraj E, Schiavi D,  
499 Mangieri A, Vaskelyte L, et al. 1-Year Outcomes After Edge-to-Edge Valve Repair for  
500 Symptomatic Tricuspid Regurgitation: Results From the TriValve Registry. *JACC Cardiovasc*  
501 *Interv.* 2019 Aug 12;12(15):1451-1461. doi: 10.1016/j.jcin.2019.04.019. PMID: 31395215.

502

503 24. Braun D, Orban M, Orban M, Hagl C, Massberg S, Nabauer M, Hausleiter J. Transcatheter  
504 Edge-to-Edge Repair for Severe Tricuspid Regurgitation Using the Triple-Orifice Technique  
505 Versus the Bicuspidalization Technique. *JACC Cardiovasc Interv.* 2018 Sep 10;11(17):1790-  
506 1792. doi: 10.1016/j.jcin.2018.05.049.

507

508 25. Braun D, Löw K, Orban M, Mehr M, Gmeiner J, Massberg S, Nabauer M, Hausleiter J.  
509 Mitraclip XTR VS. pascal transcatheter valve repair system for edge-to-edge repair of severe

510 tricuspid regurgitation. *J Am College Cardiol.* (2020) 75:1135. doi: 10.1016/S0735-  
511 1097(20)31762-9.

512

513 26. Perlman G, Praz F, Puri R, Ofek H, Ye J, Philippon F, Carrel T, Pibarot P, Attinger A, Htun  
514 NM. Transcatheter Tricuspid Valve Repair With a New Transcatheter Coaptation System for the  
515 Treatment of Severe Tricuspid Regurgitation: 1-Year Clinical and Echocardiographic Results.  
516 *JACC Cardiovasc Interv.* 2017 Oct 9;10(19):1994-2003. doi: 10.1016/j.jcin.2017.06.036.

517

518 27. Asmarats L, Perlman G, Praz F, Hensey M, Chrissoheris MP, Philippon F, Ofek H, Ye J, Puri  
519 R, Pibarot P, et al. Long-Term Outcomes of the FORMA Transcatheter Tricuspid Valve Repair  
520 System for the Treatment of Severe Tricuspid Regurgitation: Insights From the First-in-Human  
521 Experience. *JACC Cardiovasc Interv.* 2019 Aug 12;12(15):1438-1447. doi:  
522 10.1016/j.jcin.2019.04.038. PMID: 31395213.

523

524 28. Bocchino PP, Angelini F, Vairo A, Andreis A, Fortuni F, Franchin L, Frea S, Raineri C,  
525 Pidello S, Conrotto F, et al. Clinical Outcomes Following Isolated Transcatheter Tricuspid Valve  
526 Repair: A Meta-Analysis and Meta-Regression Study. *JACC Cardiovasc Interv.* 2021 Oct  
527 25;14(20):2285-2295. doi: 10.1016/j.jcin.2021.08.050.

528

529 29. Sannino A, Ilardi F, Hahn RT, Lancellotti P, Lurz P, Smith RL, Esposito G, Grayburn PA.  
530 Clinical and Echocardiographic Outcomes of Transcatheter Tricuspid Valve Interventions: A  
531 Systematic Review and Meta-Analysis. *Front Cardiovasc Med.* 2022 Jul 11;9:919395. doi:  
532 10.3389/fcvm.2022.919395. PMID: 35898276; PMCID: PMC9309386.



533

534 30. Taramasso M, Hahn RT, Alessandrini H, Latib A, Attinger-Toller A, Braun D, Brochet E,  
535 Connelly KA, Denti P, Deuschl F, et al. The International Multicenter TriValve Registry: Which  
536 Patients Are Undergoing Transcatheter Tricuspid Repair? *JACC Cardiovasc Interv.* 2017 Oct  
537 9;10(19):1982-1990. doi: 10.1016/j.jcin.2017.08.011. PMID: 28982563.

538

539 31. Chorin E, Rozenbaum Z, Topilsky Y, Konigstein M, Ziv-Baran T, Richert E, Keren G, Banai  
540 S. Tricuspid regurgitation and long-term clinical outcomes. *Eur Heart J Cardiovasc Imaging.*  
541 2020 Feb 1;21(2):157-165. doi: 10.1093/ehjci/jez216.

542

543 32. Bartko PE, Arfsten H, Frey MK, Heitzinger G, Pavo N, Cho A, Neuhold S, Tan TC, Strunk  
544 G, Hengstenberg C, et al. Natural History of Functional Tricuspid Regurgitation: Implications of  
545 Quantitative Doppler Assessment. *JACC Cardiovasc Imaging.* 2019 Mar;12(3):389-397. doi:  
546 10.1016/j.jcmg.2018.11.021.

547

548 33. Lara-Breitinger KM, Scott CG, Nkomo VT, Pellikka PA, Kane GC, Chaliki HP, Shapiro BP,  
549 Eleid MF, Alkhouli M, Greason KL, et al. Tricuspid Regurgitation Impact on Outcomes (TRIO):  
550 A Simple Clinical Risk Score. *Mayo Clin Proc.* 2022 Aug;97(8):1449-1461. doi:  
551 10.1016/j.mayocp.2022.05.015.

552

553 34. Neuhold S, Huelsmann M, Pernicka E, Graf A, Bonderman D, Adlbrecht C, Binder T,  
554 Maurer G, Pacher R, Mascherbauer J. Impact of tricuspid regurgitation on survival in patients

555 with chronic heart failure: unexpected findings of a long-term observational study. *Eur Heart J*.  
556 2013 Mar;34(11):844-52. doi: 10.1093/eurheartj/ehs465.

557

558 35. Hahn RT. Tricuspid Regurgitation. *N Engl J Med*. 2023 May 18;388(20):1876-1891. doi:  
559 10.1056/NEJMra2216709.

560

561 36. Otto CM, Nishimura RA, Bonow RO, Carabello BA, Erwin JP 3rd, Gentile F, Jneid H,  
562 Krieger EV, Mack M, McLeod C, et al. 2020 ACC/AHA Guideline for the Management of  
563 Patients With Valvular Heart Disease: Executive Summary: A Report of the American College  
564 of Cardiology/American Heart Association Joint Committee on Clinical Practice Guidelines.  
565 *Circulation*. 2021 Feb 2;143(5):e35-e71. doi: 10.1161/CIR.0000000000000932.

566

567 37. Grubb, KJ and Malaisrie, SC. Illuminating the TRILUMINATE Trial. American College of  
568 Cardiology Expert Review, May 23, 2023. Accessed August 26 2023.

569 [https://www.acc.org/latest-in-cardiology/articles/2023/05/23/10/26/illuminating-the-triluminate-](https://www.acc.org/latest-in-cardiology/articles/2023/05/23/10/26/illuminating-the-triluminate-trial)  
570 [trial](https://www.acc.org/latest-in-cardiology/articles/2023/05/23/10/26/illuminating-the-triluminate-trial).

571

572 38. Bocchino PP, Angelini F, Alushi B, Conrotto F, Cioffi GM, Tersalvi G, Senatore G,  
573 Pedrazzini G, De Ferrari GM, Biasco L. Transcatheter Aortic Valve Replacement in Young  
574 Low-Risk Patients With Severe Aortic Stenosis: A Review. *Front Cardiovasc Med*. 2020 Dec  
575 14;7:608158. doi: 10.3389/fcvm.2020.608158.

576

## 577 TABLES

578 **Table 1.** Baseline clinical characteristics of the total cohort.

| Variables                              | N = 581        |
|----------------------------------------|----------------|
| Male                                   | 277 (47.7)     |
| Female                                 | 304 (52.3)     |
| Age, years                             | 65.67 ± 17.35  |
| BMI, kg/m <sup>2</sup>                 | 28.0 ± 8.36    |
| <b>Race</b>                            |                |
| White                                  | 325 (55.9)     |
| Black                                  | 174 (29.9)     |
| Arab or Middle Eastern                 | 2 (0.3)        |
| Haitian                                | 4 (0.7)        |
| Puerto Rican                           | 14 (2.4)       |
| Cuban                                  | 6 (1.0)        |
| Asian                                  | 7 (1.2)        |
| Other                                  | 49 (8.4)       |
| <b>Ethnicity</b>                       |                |
| Hispanic or Latino                     | 66 (11.4)      |
| Other                                  | 515 (88.6)     |
| <b>Symptoms of right heart failure</b> |                |
| LE edema                               | 394 (67.8)     |
| Ascites                                | 199 (34.3)     |
| <b>NYHA Class</b>                      |                |
| 0                                      | 4/298 (1.3)    |
| I                                      | 17/298 (5.7)   |
| II                                     | 43/298 (14.4)  |
| III                                    | 175/298 (58.7) |
| IV                                     | 59/298 (19.8)  |

### Past medical history

|                    |            |
|--------------------|------------|
| Hypertension       | 466 (80.2) |
| Valve surgery      | 124 (21.3) |
| CABG               | 12 (2.1)   |
| Open heart surgery | 172 (29.6) |
| A-fib or A-flutter | 354 (60.9) |
| Pacemaker or ICD   | 197 (33.9) |
| COPD               | 179 (30.8) |
| Cirrhosis          | 103 (17.7) |
| Diabetes Mellitus  | 279 (48.0) |
| CKD                | 372 (64.0) |
| ESRD               | 115 (19.8) |

### eGFR\*

|                       |                   |
|-----------------------|-------------------|
| eGFR $\geq$ 60 mL/min | 187/391 (47.8)    |
| eGFR <60 mL/min       | 203/391 (51.9)    |
| eGFR if <60, mL/min   | 31.0 [15.0, 46.0] |

579 Values are n (%) mean  $\pm$  SD, n/N (%), or median [first quartile, third quartile]. \* eGFR was not  
580 available for patients of age >70 years.

581 A-fib or A-flutter = atrial fibrillation or atrial flutter; BMI = body mass index; CABG = coronary  
582 artery bypass graft; CKD = chronic kidney disease; COPD = chronic obstructive pulmonary  
583 disease; eGFR = estimated glomerular filtration rate; ERSR = end-stage renal disease; ICD =  
584 implantable cardiac defibrillator; LE edema = lower extremity edema.

585

586

587

588 **Table 2.** Echocardiographic parameters of the total cohort.

| Variables                         | N = 581            |
|-----------------------------------|--------------------|
| Peak TR velocity, m/s (N = 573)   | 3.40 [2.93, 3.89]  |
| RA Pressure, mmHg (N = 519)       | 15.0 [8.0, 15.0]   |
| Tricuspid valve vegetation        | 19 (3.3)           |
| Prior TVR                         | 9 (1.6)            |
| Prior TV annuloplasty             | 7 (1.2)            |
| Secondary TR                      | 539 (92.8)         |
| Primary TR                        | 42 (7.2)           |
| Primary TR type: Endocarditis     | 33/42 (78.6)       |
| Primary TR type: Carcinoid        | 2/42 (4.8)         |
| Primary TR type: Lead impingement | 6/42 (14.3)        |
| Primary TR type: Congenital       | 1/42 (2.4)         |
| Pacemaker lead present            | 121 (20.8)         |
| <b>Right Ventricle</b>            |                    |
| TAPSE, mm (N = 461)               | 15.0 [12.0, 20.0]  |
| S', cm/s (N = 276)                | 9.60 [7.45, 11.70] |
| RVSP, mmHg (N = 517)              | 58.0 [44.75, 72.0] |
| Base size, cm (N = 526)           | 4.40 [3.80, 5.10]  |
| Mid-cavitary size, cm (N = 489)   | 3.80 [3.30, 4.40]  |
| Longitudinal size, cm (N = 525)   | 7.20 [6.30, 8.20]  |
| HV flow reversal                  | 149/279 (53.4)     |
| <b>Pulmonary hypertension</b>     |                    |
| None, $\leq 34$ mmHg              | 45/537 (8.4)       |
| Mild, 35 – 44 mmHg                | 86/537 (16.0)      |
| Moderate, 45 – 54 mmHg            | 100/537 (18.6)     |
| Severe, $\geq 55$ mmHg            | 306/537 (57.0)     |
| TAPSE/PASP, mm/mmHg (N = 432)     | 0.27 [0.19, 0.38]  |

**Left heart valve dysfunction**

|                                        |            |
|----------------------------------------|------------|
| >Moderate MR                           | 51 (8.8)   |
| >Moderate MS                           | 5 (0.9)    |
| >Moderate AR                           | 9 (1.5)    |
| >Moderate AS                           | 6 (1.0)    |
| Any of the above                       | 64 (11.0)  |
| None of the above                      | 517 (89.0) |
| Qualified for left-sided valve surgery | 25 (4.3)   |

**Left ventricular dysfunction by LVEF**

|                          |            |
|--------------------------|------------|
| None, LVEF 50% – 75%     | 337 (58.0) |
| Mild, LVEF 40% – 49%     | 53 (9.1)   |
| Moderate, LVEF 30% – 39% | 40 (6.9)   |
| Severe, LVEF <30%        | 151 (26.0) |

---

589 Values are median [first quartile, third quartile], n (%), or n/N (%).

590 AR = aortic regurgitation; AS = aortic stenosis; LVEF = left ventricular ejection fraction; MR =  
591 mitral regurgitation; MS = mitral stenosis; RA Pressure = right atrial pressure; RVSP = right  
592 ventricular systolic pressure; TAPSE = tricuspid annular plane systolic excursion; TAPSE/PASP  
593 = Tricuspid annular plane systolic excursion/pulmonary artery systolic pressure; TR = tricuspid  
594 regurgitation; TV = tricuspid valve; TVR = tricuspid valve repair or replacement.

595

596 **Table 3.** TR Etiology in the total cohort and by assigned treatment group.

| Parameters              | Total cohort | Medical therapy |             | Surgery   | TTVI      |
|-------------------------|--------------|-----------------|-------------|-----------|-----------|
|                         |              | Advanced stage  | Early stage |           |           |
|                         | N = 581      | N = 443         | N = 27      | N = 54    | N = 57    |
| Primary TR              | 42 (7.2)     | 12 (2.7)        | 9 (33.3)    | 16 (29.6) | 5 (8.8)   |
| <b>Functional TR</b>    | 539 (92.8)   | 431 (97.3)      | 18 (66.7)   | 38 (70.4) | 52 (91.2) |
| Left valvular disease   | 60 (10.3)    | 33 (7.4)        | 2 (7.4)     | 23 (41.8) | 2 (3.5)   |
| LV systolic dysfunction | 157 (27.0)   | 150 (33.9)      | 1 (3.7)     | 1 (1.8)   | 5 (8.8)   |
| Severe pulmonary HTN    | 197 (33.9)   | 197 (44.5)      | 0           | 0         | 0         |
| Isolated TR             | 125 (21.5)   | 51 (11.5)       | 15 (55.6)   | 14 (25.5) | 45 (61.6) |

597 Values are n (%). Left valvular disease was defined as greater than moderate mitral or aortic  
 598 valve regurgitation or stenosis. LV systolic dysfunction was defined as LV ejection fraction  
 599 <40% and absence of moderate-severe left valvular disease. Severe pulmonary hypertension was  
 600 defined as pulmonary arterial pressure > 55 mmHg or TR jet velocity >3.6m/s with systolic  
 601 septal flattening and absence of both moderate-severe left valvular disease and LV systolic  
 602 dysfunction. Isolated TR was defined by the absence of severe pulmonary hypertension,  
 603 moderate-severe left valvular disease, and LV systolic dysfunction.

604 HTN = hypertension; LV = left ventricular; TR = tricuspid regurgitation.

605

606

607 **Table 4.** In-hospital and late mortality by treatment group.

| <b>Mortality</b> | <b>Total cohort</b> | <b>Medical therapy</b> |                    |                | <b>TTVI</b>   |
|------------------|---------------------|------------------------|--------------------|----------------|---------------|
|                  |                     | <b>Advanced stage</b>  | <b>Early stage</b> | <b>Surgery</b> |               |
|                  | <b>N = 581</b>      | <b>N = 443</b>         | <b>N = 27</b>      | <b>N = 54</b>  | <b>N = 57</b> |
| In-hospital      | 98 (16.9)           | 82 (18.5)              | 1 (3.7)            | 4 (7.4)        | 11 (19.3)     |
| Late             | 57 (9.8)            | 46 (10.4)              | 1 (3.7)            | 5 (9.3)        | 5 (8.8)       |
| Total            | 155 (26.7)          | 128 (28.9)             | 2 (7.4)            | 9 (16.7)       | 16 (28.1)     |

608 Values are n (%).

609 TTVI = transcatheter tricuspid valve intervention.

610

611



612 **FIGURES**  
613

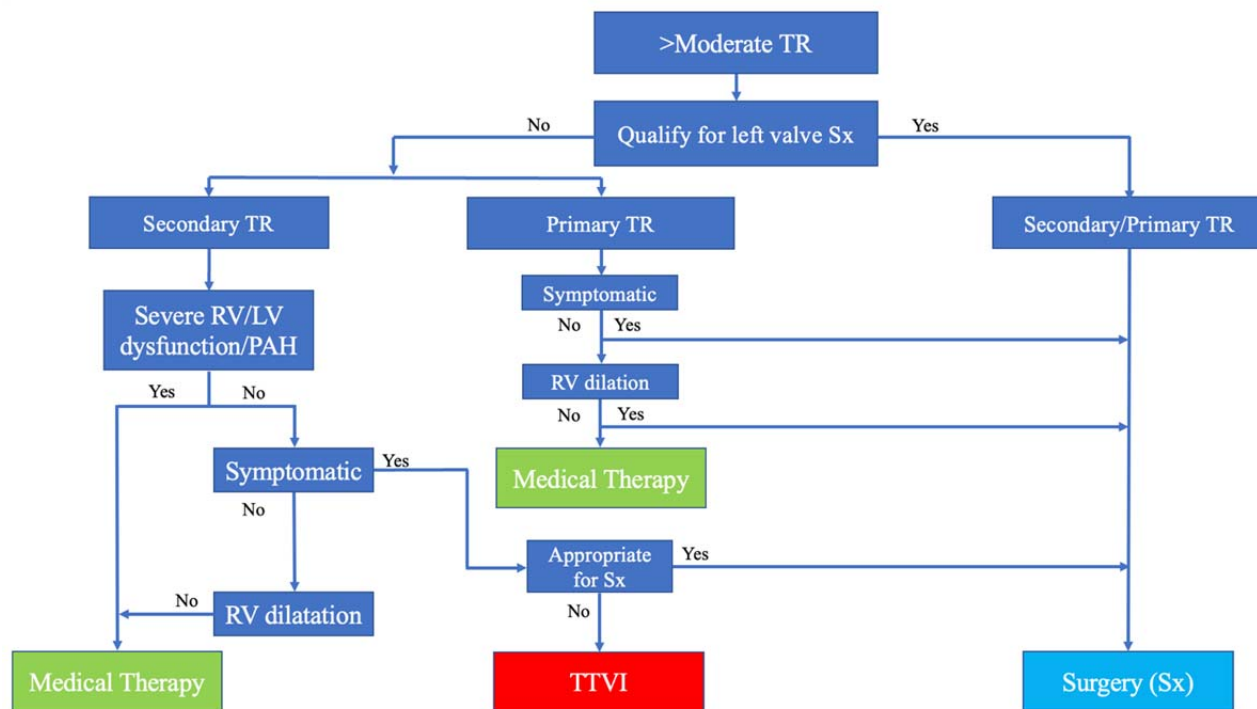

614  
615

616 **Figure 1.** Management of tricuspid regurgitation based on the 2021 ESC guidelines

617 The 2021 European Society of Cardiology (ESC) guidelines for the management of valvular  
618 disease include an algorithm for determining the management of tricuspid regurgitation (TR):  
619 medical therapy, transcatheter tricuspid valve intervention (TTVI) or surgery (Sx).

620 RV dilatation = right ventricular dilatation; Severe RV/LV dysfunction/PAH= severe right  
621 ventricular or left ventricular dysfunction or severe pulmonary arterial hypertension.

622

623

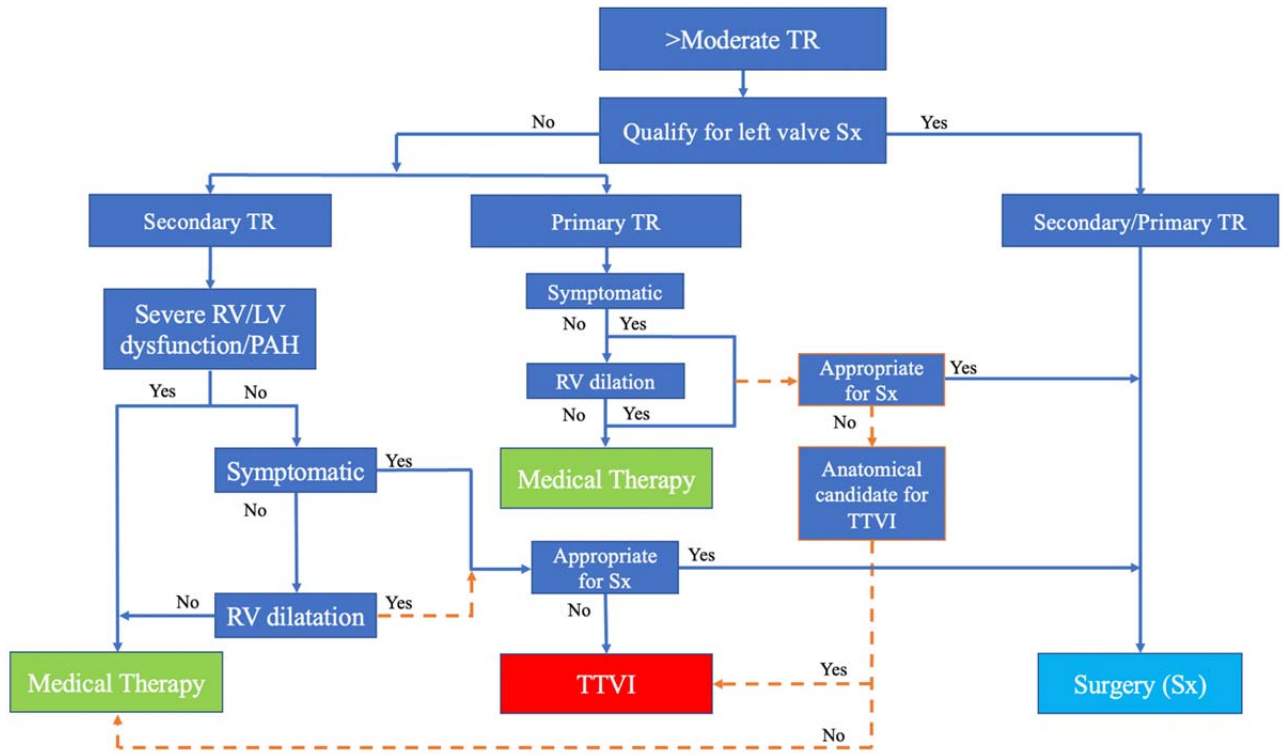

624

625 **Figure 2.** The modified ESC algorithm

626 We modified the 2021 ESC algorithm for determining the management of tricuspid regurgitation  
 627 (orange dashed lines and orange borders). Abbreviations as in Figure 1.

628

629

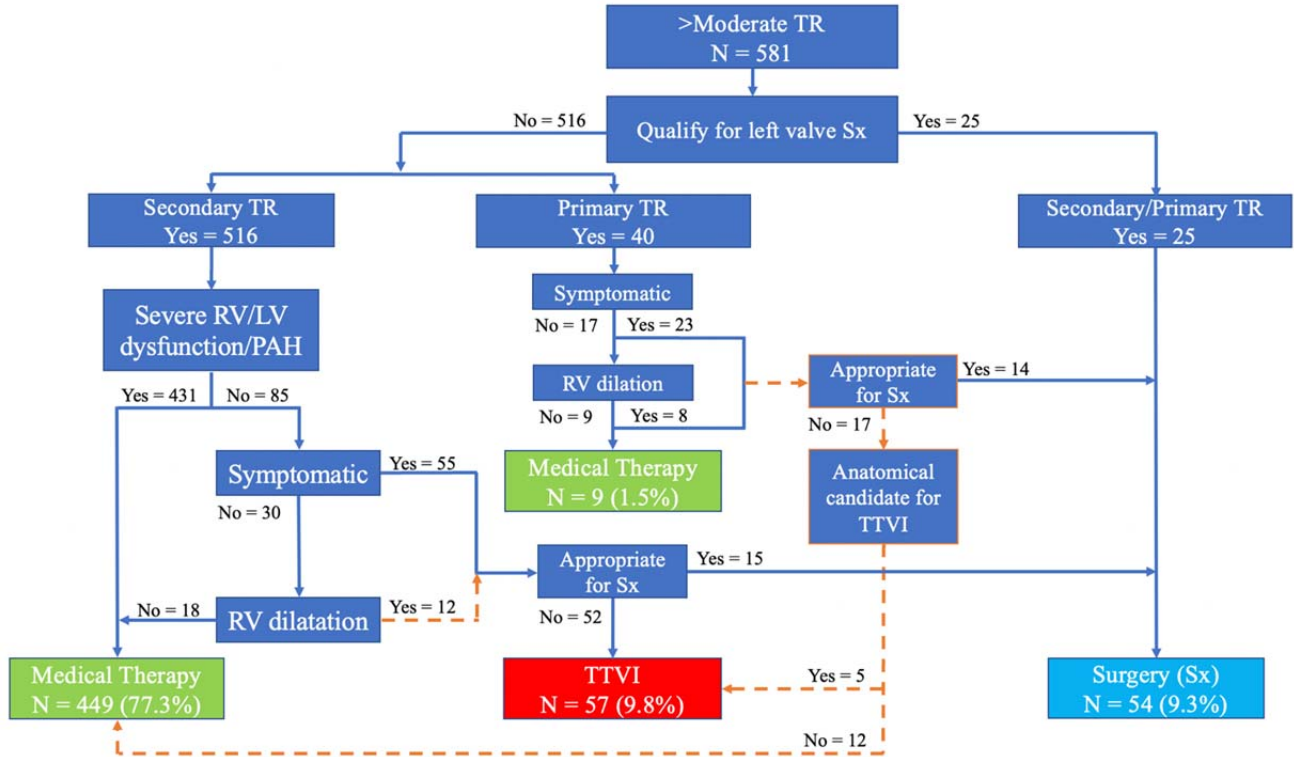

630

631 **Figure 3.** Applying the modified ESC algorithm

632 We applied the modified European Society of Cardiology (ESC) algorithm to our cohort of 581  
 633 patients with more than moderate TR and determined the numbers of patients who were  
 634 candidates for medical therapy, TTVI, or Sx. Abbreviations as in Figure 1.

635

636

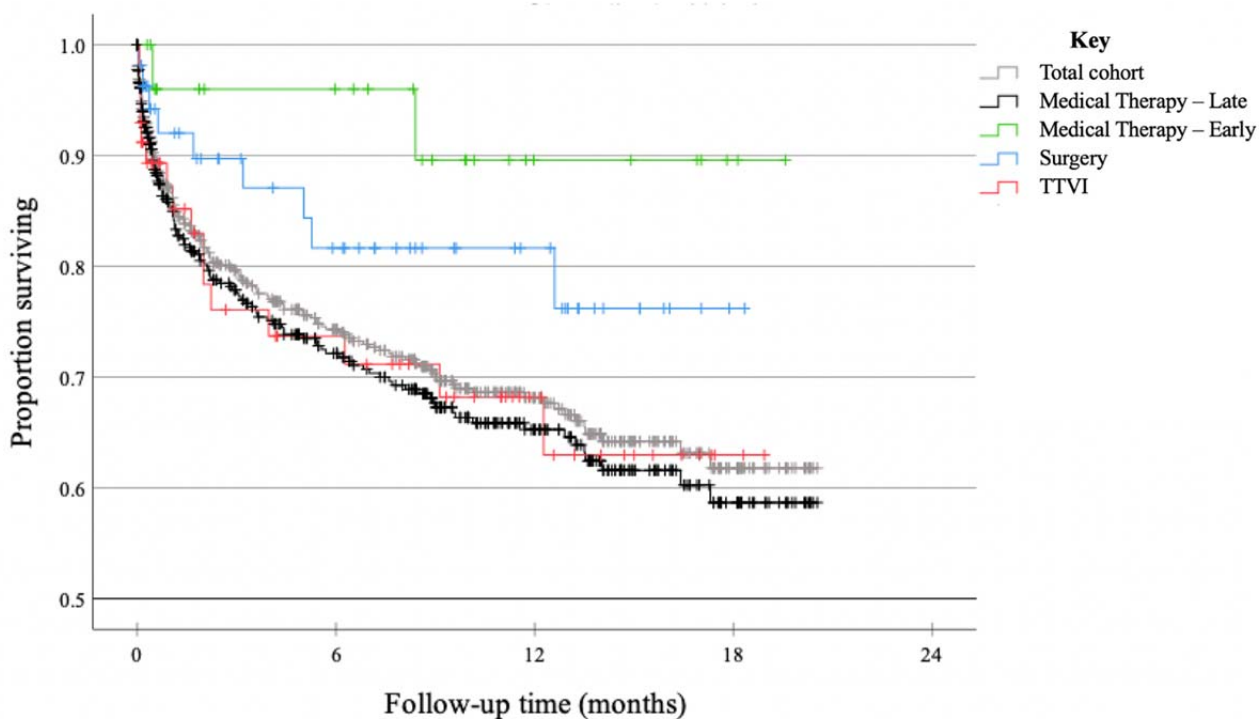

637

638 **Figure 4.** Overall survival in the total cohort and by assigned treatment group.

639 Kaplan-Meier curves of overall survival in the total cohort and by assigned treatment group, with  
 640 medical therapy divided into early and late stage (see Methods for definition of early vs. late).

641 The mean overall survival time in the total cohort was 14.5 months  $\pm$  a standard error of 0.4  
 642 months (95% confidence interval [CI] = 13.74 – 15.31 months). The mean overall survival time  
 643 was shortest in the groups assigned to TTVI (13.3  $\pm$  1.2 months, 95% CI = 11.0 – 15.6) and  
 644 medical therapy with advanced stage (14.0  $\pm$  0.5 months, 95% CI = 13.1 – 14.9). The 27 patients  
 645 assigned to medical therapy with early presentation had the longest overall survival (18.1  $\pm$  1.0  
 646 months, 95% CI = 16.1 – 20.0), followed by those assigned to surgery (15.1  $\pm$  1.0 months, 95%  
 647 CI = 13.2 – 17.0).

648

649
